# Supplementary material
Source: PubMed Central journal article supplement (PMC4153816)
Supplement: 10-1055-s-0034-1382925-sup_gf820.pdf [file 10-1055-s-0034-1382925-sup_gf820.pdf]

# Standardisierte Erhebung chirurgischer Komplikationen bei laparoskopisch-gynäkologischen Therapieverfahren unter Anwendung der Clavien-Dindo-Klassifikation

Standardised Registration of Surgical Complications in Laparoscopic-Gynaecological Therapeutic Procedures Using the Clavien-Dindo Classification

**Autoren** M. P. Radosa<sup>1</sup>, G. Meyberg-Solomayer<sup>2</sup>, J. Radosa<sup>2</sup>, J. Vorwergk<sup>1</sup>, K. Oettler<sup>1</sup>, A. Mothes<sup>1</sup>, S. Baum<sup>2</sup>, I. Juhasz-Boess<sup>2</sup>, E. Petri<sup>3</sup>, E. F. Solomayer<sup>2</sup>, I. B. Runnebaum<sup>1</sup>

**Institute**  
<sup>1</sup> Department of Gynecology and Obstetrics, Jena University Hospital, Jena  
<sup>2</sup> Department of Obstetrics and Gynecology, University of Saarland, Homburg/Saar  
<sup>3</sup> Department of Obstetrics and Gynecology, University Greifswald, Greifswald

## Schlüsselwörter

- Laparoskopie
- gynäkologische Chirurgie
- Komplikationen

## Key words

- laparoscopy
- gynaecological surgery
- complications

**eingereicht** 7. 4. 2014  
**revidiert** 18. 6. 2014  
**akzeptiert** 30. 6. 2014

## Bibliografie

**DOI** <http://dx.doi.org/10.1055/s-0034-1382925>  
 Geburtsh Frauenheilk 2014; 74:  
 1–8 © Georg Thieme Verlag KG  
 Stuttgart · New York ·  
 ISSN 0016-5751

## Korrespondenzadresse

**Prof. Ingo B. Runnebaum**  
 Jena University Hospital  
 Department of Gynecology  
 and Obstetrics  
 Bachstraße 18  
 07743 Jena  
 direktion-gyn@med.uni-jena.de

## Zusammenfassung

**Einführung:** Die Erfassung von Komplikationen stellt einen wichtigen Bestandteil bei der Evaluation operativer Therapieverfahren dar. Ziel der vorliegenden Arbeit war es, die Häufigkeit des Auftretens sowie die Schwere von chirurgischen Komplikationen nach laparoskopisch-gynäkologischen Operationen standardisiert mithilfe des Clavien-Dindo-Systems zu untersuchen.

**Material und Methodik:** Insgesamt 7438 Behandlungsverläufe nach laparoskopisch-gynäkologischen Eingriffen, erhoben von 9 Arbeitsgruppen, wurden ausgewertet. Als Kovariaten wurden technischer Schwierigkeitsgrad des Eingriffs, Art der Studienkohorte, Studiengröße, Datenakquise sowie Studienzentrum erfasst. Als Zielvariable wurde die chirurgische Morbiditätsrate, unterteilt in leichte (Clavien-Dindo Grad I–II) und schwere Komplikationen (Clavien-Dindo Grad III–V) erhoben. Ferner erfolgte eine binär logistische Regressionsanalyse für die aufgeführten Kovariaten und dem Auftreten von chirurgischen Komplikationen.

**Resultate:** 946 Komplikationen wurden erfasst (Gesamtkomplikationsrate: 13%). Hierbei handelte es sich um 664 leichte Komplikationen (8,9%) und 305 schwere Komplikationen (4,1%). Es zeigte sich eine Korrelation zwischen den Kovariaten technischer Schwierigkeitsgrad (relatives Risiko [rR] 1,37;  $p < 0,01$ ), Studiengröße (rR: 0,35;  $p < 0,01$ ) und Studienzentrum (rR 0,19;  $p < 0,01$ ) und dem Auftreten chirurgischer Komplikationen.

**Schlussfolgerungen:** Durch eine standardisierte Komplikationserfassung mithilfe der Clavien-Dindo-Klassifikation erscheint es möglich, die methodisch bedingte Unterschätzung der chirurgischen Morbidität bei der retrospektiven Auswertung von gynäkologisch-endoskopischen Therapieverfahren zu begrenzen. Als die chirurgische Morbidität gynäkologisch-laparoskopischer The-

## Abstract

**Introduction:** The registration of complications represents an important component in the evaluation of surgical therapeutic procedures. The aim of the present study was to examine the frequency of occurrence as well as the severity of surgical complications after laparoscopic-gynaecological operations in a standardised manner using the Clavien-Dindo system.

**Material and Methods:** Altogether 7438 treatment courses after laparoscopic-gynaecological interventions by 9 working groups were evaluated. Covariates recorded were the technical complexity of the operation, type of study cohort, study size, data acquisition as well as study centre. Target variables recorded were the surgical morbidity rate, subdivided into mild (Clavien-Dindo grade I–II) and severe complications (Clavien-Dindo grade III–V). In addition, a binary logistic regression analysis for the mentioned covariates and the occurrence of surgical complication was carried out.

**Results:** 946 complications were recorded (overall complication rate: 13%). These included 664 mild complications (8.9%) and 305 severe complications (4.1%). A correlation was found between the covariates technical complexity (relative risk [rR] 1.37;  $p < 0.01$ ), study size (rR: 0.35;  $p < 0.01$ ) and study centre (rR 0.19;  $p < 0.01$ ) and the occurrence of surgical complications.

**Conclusion:** By means of a standardised registration of complications using the Clavien-Dindo classification it appears to be possible to limit the methodologically caused underestimation of surgical morbidity in the retrospective evaluation of gynaecological-endoscopic therapeutic procedures. Factors decisively influencing the surgical morbidity of gynaecological-laparoscopic therapeutic procedures are the respective operative experience of the treating facility as well as the technical complexity of the intervention.

rapieverfahren maßgeblich beeinflussende Faktoren wurden die jeweilige operative Erfahrung der durchführenden Behandlungseinrichtung sowie der technische Schwierigkeitsgrad des Eingriffs identifiziert.

## Einführung

Die Erfassung von postoperativen Komplikationen stellt einen wichtigen Bestandteil bei der Evaluation chirurgischer Therapieverfahren dar [1]. Gegenwärtig wird die Erfassung chirurgischer Morbidität in klinischen Fallserien jedoch durch den Umstand erschwert, dass keine weitläufig akzeptierte Definition des Terminus „Komplikation“ existiert [2]. Standardisierte Klassifikationssysteme zur Erfassung der chirurgischen Morbidität von operativen Eingriffen geben einheitliche Definitionen für das Vorliegen einer Komplikation sowie deren Schweregrad vor. Sie tragen somit dazu bei, die chirurgische Morbidität einer operativen Technik zu erfassen, bez. der Schwere beobachteter Ereignisse diese zu kategorisieren und damit die Vergleichbarkeit einzelner Studien zu chirurgischen Therapieverfahren zu verbessern [3]. In der klinischen Routine tragen standardisierte Komplikationserfassungssysteme zu einer strukturierten Qualitätssicherung in der gynäkologischen Endoskopie und damit zu einer hohen Versorgungsqualität bei [4,5]. Die Clavien-Dindo-Klassifizierung stellt ein derartiges standardisiertes System zur Erfassung chirurgischer Komplikationen dar. Sie definiert das Auftreten einer Komplikation als jegliche Abweichung vom idealen postoperativen Verlauf, welche nicht der Operation inhärent ist und nicht als ein Therapieversagen der Operation auslegt werden kann. Konzeptionell erfolgt die Einteilung nach Schweregraden anhand der jeweiligen therapeutischen Maßnahmen, welche zur Behandlung der beobachteten Abweichung Anwendung fand (● **Tab. 1**) [6]. In ihrer aktuellen, revidierten Form hat die Cla-

vien-Dindo-Klassifikation in der viszeralchirurgischen und urologischen klinischen Forschung eine exponentielle Verbreitung über den Verlauf der letzten beiden Dekaden gefunden; ihre Verwendung zur Erfassung chirurgischer Komplikationsraten im Rahmen wissenschaftlicher Evaluationen wird in beiden Fachgebieten empfohlen [7,8]. Dagegen findet die Verwendung standardisierter Systeme zur Erfassung chirurgischer Komplikationen im Allgemeinen und die Verwendung der Clavien-Dindo-Klassifikation im Besonderen in der bislang publizierten gynäkologischen Forschungsliteratur bislang keine regelhafte Anwendung. Die vorliegende Auswertung eigener, sowie mittels einer selektiven Literaturrecherche identifizierter extern ausgewerteter Behandlungsverläufe laparoskopisch-gynäkologischer Therapieverfahren, in denen das Auftreten und der Schweregrad von chirurgischen Komplikationen primär mithilfe der Clavien-Dindo-Klassifikation erfasst wurde, erfolgte mit der Zielsetzung, die Häufigkeit des Auftretens sowie die Schwere von chirurgischen Komplikationen nach endoskopisch-gynäkologischen Operationen mittels einer standardisierten Erhebungsmethode zu untersuchen.

## Material und Methodik

### Studiendesign

In die vorliegende Analyse wurden 1050, mithilfe der Clavien-Dindo-Klassifikation standardisiert ausgewertete, laparoskopisch-gynäkologischen Behandlungsverläufe der eigenen Arbeitsgruppe sowie 6388 publizierte Behandlungsverläufe externer Arbeitsgruppen eingeschlossen.

Die Clavien-Dindo-Klassifikation als ein Instrument zur standardisierten Erfassung chirurgischer Morbidität wird im Rahmen von klinischen Forschungsprojekten von unserer Arbeitsgruppe seit dem Jahr 2009 an der Universitätsfrauenklinik Jena und seit 2011 an der Klinik für Gynäkologie und Geburtshilfe des Universitätsklinikums des Saarlandes verwendet. Für die vorliegende Analyse wurden sämtliche standardisiert ausgewerteten Behandlungsverläufe nach laparoskopischen Interventionen, die bis Juli 2013 im Rahmen von wissenschaftlich klinischen Evaluationen von der eigenen Arbeitsgruppe an beiden Behandlungseinrichtungen erhoben wurden, in einem Komplikationsregister mittels einer elektronischen Datenbank (SPSS Statistics, Version 22, IBM, Armonk, USA) in anonymisierter Form aufgenommen. Zur Identifikation weiterer bislang veröffentlichter, mittels Clavien-Dindo-Klassifikation ausgewerteter Behandlungsverläufe nach laparoskopisch-gynäkologischen Eingriffen erfolgte im Juli 2013 eine Literaturrecherche mithilfe der Datenbank *ISI Web of Science*. Ausgewählt wurden alle Originalarbeiten und Metaanalysen aus dem Bereich der Gynäkologie, die in ihrer Referenzliste auf die Clavien-Dindo-Klassifikation verwiesen [6,9]. 57 Publikationen wurden primär identifiziert, die in einem nachfolgenden Arbeitsschritt einer freitextlichen Abstraktanalyse unterzogen wurden, um Artikel auszuwählen, die thematisch ein laparoskopisch-gynäkologisches Behandlungsverfahren untersuchten. Zehn Veröffentlichungen, publiziert durch 9 Arbeitsgruppen, wurden ausgewählt (● **Tab. 2**) [10–19] und die referierten Be-

**Tab. 1** Klassifikation zur Erfassung postoperativer Komplikationen in ihrer revidierten Form nach Clavien und Dindo [6].

| Grad       | Definition                                                                                                                                                                                                                                                                                                                                                                                                          |
|------------|---------------------------------------------------------------------------------------------------------------------------------------------------------------------------------------------------------------------------------------------------------------------------------------------------------------------------------------------------------------------------------------------------------------------|
| <b>I</b>   | Jegliche Abweichung vom normalen postoperativen Verlauf ohne Notwendigkeit einer pharmakologischen Behandlung oder einer chirurgischen endoskopischen oder radiologischen Intervention. Erlaubte therapeutische Maßnahmen: Medikamente aus der Substanzklasse der Antiemetika, Antipyretika, Analgetika, Diuretika; Elektrolytsubstitution und Physiotherapie. Chirurgische Behandlung von Wundinfektionen am Bett. |
| <b>II</b>  | Medikamentöse Behandlung, welche über die aufgeführten pharmakologischen Maßnahmen in Grad I hinausgeht. Bluttransfusionen und parenterale Ernährung.                                                                                                                                                                                                                                                               |
| <b>III</b> | Notwendigkeit der chirurgischen, endoskopischen oder radiologischen Intervention.                                                                                                                                                                                                                                                                                                                                   |
| IIIa       | Intervention ohne allgemeine Anästhesie.                                                                                                                                                                                                                                                                                                                                                                            |
| IIIb       | Intervention mit allgemeiner Anästhesie.                                                                                                                                                                                                                                                                                                                                                                            |
| <b>IV</b>  | Lebensbedrohliche Komplikationen, welche die Verlegung auf eine Intermediate-Care- oder eine intensivmedizinische Station bedingen.                                                                                                                                                                                                                                                                                 |
| IVa        | Dysfunktion eines Organsystems (schließt die Notwendigkeit zur temporären Dialyse mit ein).                                                                                                                                                                                                                                                                                                                         |
| IVb        | Multiorgandysfunktion.                                                                                                                                                                                                                                                                                                                                                                                              |
| <b>V</b>   | Tod des Patienten.                                                                                                                                                                                                                                                                                                                                                                                                  |
| Suffix d   | Komplikationsgrad wird mit einem Suffix d versehen, falls die Komplikation bei Entlassung des Patienten weiterhin behandlungsbedürftig ist.                                                                                                                                                                                                                                                                         |

Tab. 2 Ausgewertete Publikationen.

| Studie                        | Publikationsart | Therapieverfahren                                             | n     | Schwierigkeitsgrad | Studienkohorte | Datenerhebung |
|-------------------------------|-----------------|---------------------------------------------------------------|-------|--------------------|----------------|---------------|
| Chi D et al., 2004 [10]       | Originalarbeit  | verschiedene Operationsverfahren                              | 1 451 | I/II/III/IV        | onkologisch    | prospektiv    |
| Siedhoff MT et al., 2012 [11] | Originalarbeit  | Hysterektomie                                                 | 834   | II                 | gemischt       | retrospektiv  |
| Alperin M et al., 2012 [12]   | Originalarbeit  | Hysterektomie                                                 | 446   | II                 | gemischt       | retrospektiv  |
| Fagotti A et al., 2012 [13]   | Originalarbeit  | radikale Hysterektomie mit retroperitonealer Lymphadenektomie | 75    | IV                 | onkologisch    | retrospektiv  |
| Soudaka A et al., 2012 [14]   | Originalarbeit  | retroperitoneale Lymphadenektomie                             | 98    | IV                 | onkologisch    | retrospektiv  |
| Palomba S et al., 2012 [15]   | Originalarbeit  | retroperitoneale Lymphadenektomie                             | 403   | IV                 | onkologisch    | retrospektiv  |
| Kondo W et al., 2011 [16]     | Originalarbeit  | Hysterektomie                                                 | 2 092 | II                 | gemischt       | retrospektiv  |
| Kondo W et al., 2011 [17]     | Originalarbeit  | Resektion tief infiltrierender Endometriose                   | 568   | IV                 | gemischt       | retrospektiv  |
| Gendy R et al., 2011 [18]     | Metaanalyse     | Hysterektomie                                                 | 332   | II                 | gemischt       | prospektiv    |
| Hong JH et al., 2010 [19]     | Originalarbeit  | retroperitoneale Lymphadenektomie                             | 89    | IV                 | onkologisch    | retrospektiv  |

**Studie:** eingeschlossene Publikationen; **Therapieverfahren:** untersuchtes laparoskopisches Therapieverfahren; **n:** Anzahl der eingeschlossenen Behandlungsverläufe; **Schwierigkeitsgrad:** technischer Schwierigkeitsgrad der analysierten Therapieverfahren nach Barakat (Chi et al., 2004); **Studienkohorte:** Art der untersuchten Studienkollektive; **Datenerhebung:** Art der Datenerhebung.

handlungsverläufe in unser Komplikationsregister zur weiterführenden Analyse aufgenommen.

### Methodik der Auswertung

Bei den eingeschlossenen Behandlungsverläufen, bestehend aus Studienkohorten der eigenen Arbeitsgruppe, sowie den mittels Literaturrecherche identifizierten Studienkohorten wurden die Kovariaten *technischer Schwierigkeitsgrad des laparoskopischen Eingriffs*, *Art der Studienkohorte*, *Studiengröße*, *Datenakquise* sowie *Studienzentrum* erfasst. Dabei erfolgte die Erhebung dieser Kovariaten für die mittels Literaturrecherche identifizierten Behandlungsverläufe durch eine Volltextanalyse der entsprechenden Artikel. Für die Einordnung nach *technischem Schwierigkeitsgrad* der jeweiligen laparoskopischen Interventionen erfolgte die Einteilung gemäß eines Klassifikationsvorschlags der Arbeitsgruppe von Barakat und Abu-Rustum in Eingriffe mit niedrigem und mittlerem technischem Schwierigkeitsgrad (Level I–II) sowie Eingriffe mit gehobenem und hohem Schwierigkeitsgrad (Level III–IV) (● Tab. 3) [10]. Bei der *Art der Studienkohorte* wurde zwischen gemischten Studienkollektiven sowie Studienkohorten, in

den ausschließlich die Behandlungsverläufe gynäkologisch-onkologischer Patientinnen ausgewertet wurden, unterschieden. Für die Kovariate *Studiengröße* wurden Behandlungsverläufe aus Forschungsarbeiten mit Patientenkohorten mit weniger als 500 Patientinnen, Analysen mit Kohorten von 500 und mehr Patientinnen gegenübergestellt. Bei der Kovariate *Datenakquise* wurde unterschieden, ob in den eingeschlossenen Behandlungsverläufen aufgetretene postoperative Komplikationen retrospektiv oder prospektiv erfasst wurden. Bezüglich der Kovariate *Studienzentrum* wurden durch die eigene Arbeitsgruppe ausgewertete Behandlungsverläufe den Behandlungsverläufen der anderen Arbeitsgruppen gegenübergestellt. Bei den in den eingeschlossenen Behandlungsverläufen als Zielvariablen mittels Clavien–Dindo-Klassifikation erfassten postoperativen Komplikationen erfolgte eine Unterteilung in *leichte* (Clavien–Dindo Grad I–II) und *schwere Komplikationen* (Grad III–V). Für die Berechnung der Mortalitätsrate in den ausgewerteten Behandlungsverläufen wurden Komplikationen des Schweregrads V nach Clavien–Dindo verwendet.

### Statistik

Nach deskriptiver Datenanalyse erfolgte eine weiterführende Untersuchung bez. eines Zusammenhangs der oben aufgeführten Kovariaten und dem Auftreten von postoperativen Komplikationen. Hierzu wurde eine binär logistische Regressionsanalyse für die Kovariaten *technische Schwierigkeit*, *Kohortengröße*, *Datenakquise*, *Studienkohorte* und *Studienzentrum* und dem Auftreten von *postoperativen Komplikationen insgesamt*, dem Auftreten von *leichten postoperativen Komplikationen* und dem Auftreten von *schweren postoperativen Komplikationen* durchgeführt. Für jede Kovariate wurde die Wald-Statistik, das relative Risiko, das Signifikanzniveau  $p$  sowie ein 95-prozentiges Konfidenzintervall berechnet.

### Ergebnisse

#### ▼ Deskriptive Analyse

Insgesamt wurden für die Analyse 7438 Behandlungsverläufe eingeschlossen. 1050 Behandlungsverläufe wurden hierbei von der eigenen Arbeitsgruppe im Rahmen von 4 klinischen Evaluationen zu laparoskopisch-gynäkologischen Therapieverfahren

Tab. 3 Klassifizierung laparoskopischer Eingriffe in der Gynäkologie gemäß technischem Schwierigkeitsgrad nach Chi et al. [10].

| Schwierigkeitsstufe | Art des Eingriffs                                                                                                                                                                                                                                                                                                                       |
|---------------------|-----------------------------------------------------------------------------------------------------------------------------------------------------------------------------------------------------------------------------------------------------------------------------------------------------------------------------------------|
| Stufe I             | diagnostische Laparoskopien                                                                                                                                                                                                                                                                                                             |
| Stufe II            | <ul style="list-style-type: none"> <li>▶ ein- oder beidseitige Adnexektomie</li> <li>▶ ein- oder beidseitige Zystenausschälung am Ovar</li> <li>▶ Hysterektomie (laparoskopisch, suprazervikal, laparoskopisch-assistiert vaginal)</li> <li>▶ Myomektomie</li> <li>▶ Adhäsiolyse/Resektion oberflächlicher Endometrioseherde</li> </ul> |
| Stufe III           | <ul style="list-style-type: none"> <li>▶ Second-Look-Laparoskopien nach Laparotomie bei gynäkologisch-onkologischen Patientinnen</li> <li>▶ rekonstruktive urogynäkologische Chirurgie</li> <li>▶ Adhäsiolyse nach onkologisch, chirurgischen Eingriffen im Abdomen oder Becken</li> </ul>                                              |
| Stufe IV            | <ul style="list-style-type: none"> <li>▶ retroperitoneale Lymphadenektomie</li> <li>▶ erweiterte Hysterektomie</li> <li>▶ Darm-/Blasen-/Harnleiterresektionen mit oder ohne laparoskopischer Naht bzw. Anastomose</li> </ul>                                                                                                            |

**Tab. 4** Übersicht – ausgewertete Studienkollektive.

| Studienkohorte       | Kohorten-<br>größe (n) | technische Schwierigkeit<br>nach Barakat | Komplikationen nach Schweregraden<br>Clavien-Dindo (n) |     |    |     |    | Komplikationen<br>gesamt |       |     |
|----------------------|------------------------|------------------------------------------|--------------------------------------------------------|-----|----|-----|----|--------------------------|-------|-----|
|                      |                        |                                          | n                                                      | I   | II | III | IV | V                        | (n)   | (%) |
| eigene Arbeitsgruppe | 1 050                  |                                          |                                                        |     |    |     |    | 65                       | 6,19  |     |
|                      |                        | II                                       | 948                                                    | 26  | 13 | 14  | 0  | 0                        | 53    |     |
|                      |                        | III                                      | 102                                                    | 6   | 5  | 1   | 0  | 0                        | 12    |     |
| Chi et al.           | 1 451                  |                                          |                                                        |     |    |     |    | 129                      | 8,89  |     |
|                      |                        | I                                        | 146                                                    | 14  | 1  | 4   | 0  | 3                        | 22    |     |
|                      |                        | II                                       | 1 002                                                  | 42  | 24 | 20  | 0  | 0                        | 86    |     |
|                      |                        | III                                      | 224                                                    | 5   | 5  | 6   | 1  | 0                        | 17    |     |
|                      |                        | IV                                       | 79                                                     | 1   | 1  | 2   | 0  | 0                        | 4     |     |
| Siedhoff et al.      | 834                    |                                          |                                                        |     |    |     |    | 130                      | 15,59 |     |
|                      |                        | II                                       | 834                                                    | 10  | 78 | 38  | 4  | 0                        |       |     |
| Alperin et al.       | 446                    |                                          |                                                        |     |    |     |    | 82                       | 18,39 |     |
|                      |                        | II                                       | 446                                                    | 30  | 27 | 23  | 2  | 0                        |       |     |
| Fagotti et al.       | 75                     |                                          |                                                        |     |    |     |    | 3                        | 4     |     |
|                      |                        | IV                                       | 75                                                     | 0   | 2  | 1   | 0  | 0                        |       |     |
| Soudaka et al.       | 98                     |                                          |                                                        |     |    |     |    | 8                        | 8,16  |     |
| Palomba et al.       | 403                    |                                          |                                                        |     |    |     |    | 166                      | 41,21 |     |
|                      |                        | IV                                       | 403                                                    | 44  | 28 | 52  | 40 | 2                        |       |     |
| Kondo et al.         | 2 660                  |                                          |                                                        |     |    |     |    | 264                      | 9,92  |     |
|                      |                        | II                                       | 2 092                                                  | 100 | 55 | 31  | 0  | 0                        | 186   |     |
|                      |                        | IV                                       | 568                                                    | 38  | 12 | 28  | 0  | 0                        | 78    |     |
| Gendy et al.         | 332                    |                                          |                                                        |     |    |     |    | 113                      | 34,04 |     |
|                      |                        | II                                       | 332                                                    | 30  | 64 | 19  | 0  | 0                        |       |     |
| Hong et al.          | 89                     |                                          |                                                        |     |    |     |    | 8                        | 8,98  |     |
|                      |                        | IV                                       | 89                                                     | 4   | 2  | 2   | 0  | 0                        |       |     |

ausgewertet: An der Universitätsfrauenklinik Jena wurde retrospektiv die chirurgische Morbidität von 553 Eingriffen erhoben, hiervon 451 Eingriffe mit technischer Schwierigkeitsstufe II nach Barakat und 102 Eingriffe der Schwierigkeitsstufe III [20, 21]. 497 Behandlungsverläufe wurden an der Klinik für Geburtshilfe und Gynäkologie des Universitätsklinikum des Saarlandes ausgewertet, hiervon 202 Behandlungsverläufe der Schwierigkeitsstufe II im Rahmen einer retrospektiven Evaluation zur Lebensqualität nach laparoskopischer Hysterektomie und 295 Behandlungsverläufe der Schwierigkeitsstufe II in einer prospektiven klinischen Untersuchung zur Schmerzreduktion nach laparoskopischer totaler oder subtotaler Hysterektomie [22]. Die mithilfe der Literaturrecherche identifizierten 6388 Behandlungsverläufe wurden von insgesamt 9 Arbeitsgruppen erhoben: Im Rahmen von 3 Originalarbeiten und 1 Metaanalyse wurde die perioperative Morbidität nach laparoskopischer Hysterektomie evaluiert, 3 Arbeiten erfassten chirurgische Komplikationen nach laparoskopischer, retroperitonealer Lymphadenektomie und in jeweils 1 Studie wurde die chirurgische Morbidität, nach laparoskopischer Resektion von tief infiltrierender Endometriose, sowie nach laparoskopischer radikaler Hysterektomie mit retroperitonealer Lymphadenektomie evaluiert. Eine letzte Publikation untersuchte standardisiert die Komplikationsrate bei onkologischen Patientinnen nach laparoskopischen gynäkologischen Eingriffen unterschiedlicher Art (● Tab. 4).

Insgesamt wurden 146 laparoskopische Eingriffe des technischen Schwierigkeitsgrads I, 5654 Eingriffe des Schwierigkeitsgrads II, 326 Eingriffe des Schwierigkeitsgrads III sowie 1312 Eingriffe der Schwierigkeitsgrads IV ausgewertet.

Die Erfassung der aufgetretenen postoperativen Komplikationen erfolgte bei 5360 Behandlungsverläufen retrospektiv und in 2078

Behandlungsverläufen im Rahmen von prospektiven klinischen Evaluationen.

5220 Behandlungsverläufe wurden in Untersuchungen erhoben, in denen ausschließlich Patientinnen mit einer malignen Grunderkrankung eingeschlossen wurden; 2218 Behandlungsverläufe entstammen aus gemischten Patientenkollektiven.

2493 aller eingeschlossenen Behandlungsverläufe wurden in klinischen Untersuchungen mit Patientenkohorten mit einem Umfang von weniger als 500 Patientinnen ausgewertet, 4945 Behandlungsverläufe wurden in Untersuchungen mit Patientenkohorten, die 500 und mehr Patientinnen umfassten, erhoben.

### Logistische Regressionsanalyse

Im gesamten untersuchten Kollektiv traten 969 Komplikationen auf (Gesamtkomplikationsrate: 13%). Hierbei handelte es sich um 664 leichte Komplikationen (Clavien-Dindo Grad I–II; 8,9%) sowie um 305 schwere Komplikationen (Grad III–V; 4,1%). Die Mortalitätsrate lag im beobachteten Kollektiv bei 0,1% (● Tab. 4). In der binär logistischen Regressionsanalyse zeigte sich eine signifikante Abhängigkeit zwischen den Kovariaten *technischer Schwierigkeitsgrad*, *Studiengröße*, und *Studienzentrum* und dem Auftreten von chirurgischen Komplikationen insgesamt. Die Kovariaten *Datenakquise* sowie *Studienkollektiv* hatten keinen signifikanten Einfluss auf die Gesamtrate beobachteter Komplikationen.

Nach Eingriffen mit gehobenem und hohem Schwierigkeitsgrad traten signifikant häufiger Komplikationen auf (rR: 1,37;  $p < 0,01$ ). Ursächlich für diese erhöhte Rate chirurgischer Morbidität war das gehäufte Auftreten von schweren Komplikationen nach Eingriffen mit gehobenem und hohem Schwierigkeitsgrad (Grad III–V; rR: 2,37;  $p < 0,01$ ). Dagegen ergab sich für das Auftreten von leichten Komplikationen (Grad I–II) kein signifikanter



**Tab. 5** Binäre logistische Regressionsanalyse, Risikofaktoren für das Auftreten von Komplikationen.

| Kovariate                                           | Wald  | relatives Risiko | p      | 95%-Konfidenzintervall |             |
|-----------------------------------------------------|-------|------------------|--------|------------------------|-------------|
|                                                     |       |                  |        | unterer Wert           | oberer Wert |
| <b>Komplikationen insgesamt</b>                     |       |                  |        |                        |             |
| erhöhte technische Schwierigkeit                    | 16,32 | 2,04             | < 0,01 | 1,44                   | 2,89        |
| große Studienkohorte (≥ 500)                        | 59,98 | 0,35             | < 0,01 | 0,26                   | 0,45        |
| eigene Arbeitsgruppe                                | 34,87 | 0,19             | < 0,01 | 0,11                   | 0,34        |
| onkologische Studienkohorte                         | 0,84  | 1,18             | 0,36   | 0,82                   | 1,69        |
| retrospektive Datenakquise                          | 2,81  | 0,74             | 0,09   | 0,52                   | 1,05        |
| <b>leichte Komplikationen (Clavien-Dindo I–II)</b>  |       |                  |        |                        |             |
| erhöhte technische Schwierigkeit                    | 7,45  | 0,75             | 0,06   | 0,62                   | 1,02        |
| große Studienkohorte (≥ 500)                        | 91,41 | 0,41             | < 0,01 | 0,34                   | 0,49        |
| eigene Arbeitsgruppe                                | 76,51 | 0,23             | < 0,01 | 0,17                   | 0,32        |
| <b>schwere Komplikationen (Clavien-Dindo III–V)</b> |       |                  |        |                        |             |
| erhöhte technische Schwierigkeit                    | 46,47 | 2,37             | < 0,01 | 1,85                   | 3,03        |
| große Studienkohorte (≥ 500)                        | 75,38 | 0,33             | < 0,01 | 0,26                   | 0,42        |
| eigene Arbeitsgruppe                                | 37,15 | 0,19             | < 0,01 | 0,11                   | 0,32        |

**erhöhte technische Schwierigkeit:** laparoskopische Eingriffe mit Schwierigkeitsstufe III und IV nach Barakat; **große Studienkohorte (≥ 500):** analysierte Behandlungsverläufe aus Studienkollektiven mit 500 und mehr Patientinnen; **eigene Arbeitsgruppe:** analysierte Behandlungsverläufe aus der eigenen Arbeitsgruppe; **onkologische Studienkohorte:** analysierte Behandlungsverläufe aus onkologischen Studienkollektiven; **retrospektive Datenakquise:** Behandlungsverläufe retrospektiv analysiert.

Unterschied zwischen Eingriffen mit gehobenem und hohem Schwierigkeitsgrad sowie Eingriffen mit leichtem und mittlerem Schwierigkeitsgrad.

In klinischen Untersuchungen mit Patientenkohorten von 500 und mehr Patientinnen wurde im Vergleich zu Untersuchungen mit Patientenkohorten unter 500 Patienten signifikant niedrigere Komplikationsraten beobachtet (rR: 0,35;  $p < 0,01$ ). Dies betraf sowohl die Häufigkeit des Auftretens leichter Komplikationen (rR: 0,33;  $p < 0,01$ ) als auch die Häufigkeit des Auftretens schwerer Komplikationen (rR: 0,41;  $p < 0,01$ ).

Weiterhin wurde in Behandlungsverläufen aus Studien der eigenen Arbeitsgruppe eine signifikant niedrigere Komplikationsrate beobachtet (rR: 0,19;  $p < 0,01$ ). Dieses erniedrigte Risiko ließ sich dabei ebenfalls sowohl für das Auftreten leichter Komplikationen (rR: 0,2;  $p < 0,01$ ) als auch für das Auftreten schwerer Komplikationen nachweisen (rR: 0,23;  $p < 0,01$ ) (● **Tab. 5**).

## Diskussion

Gynäkologisch-laparoskopische Eingriffe werden im Allgemeinen mit einer niedrigen chirurgischen Morbidität assoziiert [23–25]. Diese Einschätzung wurde maßgeblich durch 2 Untersuchungen zur postoperativen Morbidität nach minimalinvasiven gynäkologischen Eingriffen aus der letzten Dekade des vergangenen Jahrhunderts beeinflusst: Chapron und Mitarbeiter ermittelten die chirurgische Komplikationsrate nach gynäkologisch-laparoskopischen Eingriffen retrospektiv an 7 universitären endoskopischen Zentren im Zeitraum von 1985 bis 1995, mit insgesamt 29966 eingeschlossenen Patientinnen. Die Gesamtkomplikationsrate wurde im untersuchten Kollektiv mit 0,46% angegeben. Nach freitextlicher Analyse der in der Publikation aufgeführten Komplikationen traten hierbei 96 Ereignisse auf, die nach Clavien-Dindo einem Schweregrad III und höher zugeordnet werden können. Dies entspricht einer Rate an schweren Komplikationen von 0,32% [26]. In einer zweiten Untersuchung wertete Harkki-Siren 1997 die Daten des finnischen Krankenkassenentschädigungsfonds bez. Schadensanzeigen aufgrund chirurgischer Komplikationen nach gynäkologisch-laparoskopi-

schen Eingriffen aus. Bei den im Beobachtungszeitraum der Studie durch gesetzliche Versicherungsträger erstatteten 70607 gynäkologisch-laparoskopischen Operationen wurden 0,36% Schadensfälle aufgrund chirurgischer Komplikationen erfasst; bei insgesamt 10 der bearbeiteten Eingaben wurde von der zuständigen Verwaltungsbehörde dabei ein Schadensfall aufgrund einer „schweren Komplikation“ verzeichnet. Die hierbei verwendete Definition des Begriffs „schwere Komplikation“ entspricht im Wesentlichen den Schweregraden III–V nach Clavien-Dindo [27]. Über erheblich höhere Komplikationsraten bei gynäkologisch-laparoskopischen Eingriffen wurden in der Folgezeit in prospektiv erhobenen monozentrischen Untersuchungen berichtet: Mirhashemi ermittelte chirurgische Morbiditätsraten nach gynäkologisch-laparoskopischen Eingriffen in einem akademischen Lehrkrankenhaus; die Gesamtkomplikationsrate betrug in der Untersuchung 19,6% und die Rate an schweren Komplikationen mit Indikation zur operativen Revision lag bei 4,7% [28]. Saidi berichtete über eine vergleichbare Komplikationsrate (10,4% insgesamt; 5,1% schwere Komplikationen) nach gynäkologisch-laparoskopischen Eingriffen unterschiedlicher Schwierigkeitsgrade [29]. Eine französische Arbeit, die 1033 gynäkologische Laparoskopien von mittlerem und gehobenem Schwierigkeitsgrad (Stufe III und IV nach Barakat) an einer Behandlungseinrichtung auswertete, ermittelte eine Komplikationsrate von 3%, die in der Publikation aufgeführten Komplikationen lassen sich dabei den Schweregraden III bis V nach Clavien-Dindo zuordnen [30].

Die in der eigenen Analyse für gynäkologisch-laparoskopische Eingriffe aus den Daten von 10 Behandlungseinrichtungen gemittelte Komplikationsrate liegt in einer vergleichbaren Größenordnung mit den Ergebnissen der vorangehend zitierten, prospektiven monozentrischen Studien. Im Vergleich mit den retrospektiven Auswertungen von Chapron und Hakki-Siren liegen sowohl die Gesamtkomplikationsrate als auch die Rate an schweren Komplikationen dagegen um etwa den Faktor 10 höher. Die Ursache für eine solch unterschiedliche Bewertung des postoperativen Morbiditätsrisikos gynäkologisch-laparoskopischer Eingriffe erscheint methodeninhärent: Hakki-Siren ermittelte die Komplikationsrate nicht durch eine Auswertung einzelner Behandlungsverläufe, sondern über das Verhältnis von Schadensfällen,

bedingt durch chirurgische Komplikationen, sowie der Anzahl aller vom finnischen Krankenkassenverband erstatteter, gynäkologisch-laparoskopischer Eingriffe im Beobachtungszeitraum. Die Verwendung eines derartigen Surrogatparameters für die chirurgische Morbidität nach operativen Eingriffen könnte einen Bias im Sinne einer Unterschätzung der tatsächlich aufgetretenen Komplikationsrate darstellen. Bei der Untersuchung von Chapron wird nicht näher ausgeführt, welche Definition des Begriffs „Komplikation“ bei der Auswertung des Studienkollektivs Verwendung fand; ein standardisiertes Vorgehen bei der Erfassung der im untersuchten Patientenkollektiv aufgetretenen Komplikationen wird in der Publikation nicht beschrieben. Die von den Autoren freitextlich aufgeführten Komplikationen können den Schweregraden III und höher gemäß Clavien-Dindo-Klassifikation zugeordnet werden. Über ein Auftreten von Komplikationen der Schweregrade I und II wird nicht berichtet; ein Umstand, der auf eine systematische Unterschätzung bei der Komplikationserfassung hindeuten könnte.

Insgesamt weist die unterschiedliche Bewertung der Morbidität gynäkologisch-laparoskopischer Eingriffe durch einzelne Arbeitsgruppen darauf hin, dass ein laparoskopischer Zugangsweg als solches nicht a priori mit einer niedrigen Komplikationsrate gleichgesetzt werden sollte. Vielmehr scheint das Risiko für Komplikationen bei gynäkologisch-laparoskopischen Operationsverfahren in erheblichem Maße durch Kovariaten beeinflusst zu werden.

Zu den bislang für die gynäkologische Endoskopie identifizierten Faktoren für ein erhöhtes Komplikationsrisiko gehören der technische Schwierigkeitsgrad des jeweiligen Operationsverfahrens [4], die chirurgische Erfahrung des Operateurs sowie der Umstand [31], ob es sich bei der jeweiligen Operationsmethode um ein neues oder bereits etabliertes Verfahren an der Behandlungseinrichtung handelt [32,33]. Nicht einheitlich wird der Einfluss maligner Begleiterkrankungen auf die chirurgische Morbidität bewertet: Während einige Autoren für Patientenkollektive mit malignen Grunderkrankungen eine signifikant höhere Rate an Komplikationen bei gynäkologisch-laparoskopischen Erkrankungen beschrieben, konnten andere Arbeitsgruppen eine derartige Korrelation nicht nachweisen [34,35]. Schließlich sehen einige Autoren eine retrospektive, nicht standardisierte Erfassung der chirurgischen Morbidität bei der Evaluation von chirurgischen Therapieverfahren als eine methodenimmanente Ursache für eine systematische Unterschätzung tatsächlich vorliegender Komplikationsraten an [36].

Eine Assoziation von einerseits technischem Schwierigkeitsgrad des laparoskopischen Eingriffs und andererseits von chirurgischen Komplikationen wurde auch in unserer Untersuchung beobachtet: Eingriffe des Schwierigkeitsgrads III und IV nach Barakat wiesen eine signifikant höhere Anzahl schwerer Komplikationen auf, woraus eine ebenfalls signifikant erhöhte Rate an Gesamtmorbidität bei dieser Eingriffsgruppe resultierte. Vergleicht man die Komplikationsraten von gynäkologisch-laparoskopischen Therapieverfahren mit mittlerem und gehobenem technischem Schwierigkeitsgrad in der eigenen Analyse mit publizierten Daten aus der letzten Dekade des vergangenen Jahrhunderts, so kann der Eindruck entstehen, dass derartige operative Eingriffe heute paradoxerweise mit einer erhöhten Rate an Morbidität einhergehen. Die gemittelte Komplikationsrate aus 10 Untersuchungen der Jahre 2004 bis 2013 in der eigenen Analyse beträgt 18,07%; dagegen berichtet Chapron 1998 über eine Komplikationsrate von lediglich 8,9% für laparoskopische Eingriffe mit fortgeschrittenem Schwierigkeitsgrad [26]. Als ursächlich für

diesen beobachteten Anstieg an chirurgischen Komplikationen bei gynäkologisch-laparoskopischen Eingriffen von gehobenem und fortgeschrittenem Schwierigkeitsgrad kann die Fortentwicklung endoskopischer Techniken und eine damit verbundene Ausweitung der Anwendungsgebiete dieser Therapieverfahren angesehen werden: Chapron verwendete eine Klassifikation nach Querleu zur Einteilung der untersuchten endoskopischen Therapieverfahren gemäß des jeweiligen Schwierigkeitsgrads [37]. Die Durchführung einer laparoskopischen Hysterektomie wird nach Querleu als ein Eingriff der Kategorie IV, dem höchsten Schwierigkeitsgrad der Klassifikation, eingeordnet. Neuere Klassifizierungssysteme, wie die in unserer Untersuchung verwendete Einteilung nach Chi, ordnen die laparoskopische Hysterektomie dagegen als einen Eingriff der Kategorie II (mittlerer Schwierigkeit) ein [10]. Dagegen werden operative Techniken wie die laparoskopische retroperitoneale Lymphadenektomie, die in den vergangenen Jahrzehnten das Spektrum der endoskopischen Chirurgie in der Gynäkologie erweitert haben, als Eingriffe von hohem Schwierigkeitsgrad (Kategorie IV) angesehen. Die Ergebnisse der eigenen Untersuchung legen nahe, dass diese Eingriffe sich hinsichtlich ihrer postoperativen Morbidität erheblich von diagnostischen und therapeutischen Eingriffen der Schwierigkeitsstufen I und II nach Chi unterscheiden.

Vorangegangene Arbeiten konnten eine Abhängigkeit chirurgischer Morbidität und dem Grad der Erfahrung des Operateurs mit der jeweiligen laparoskopischen Operation, als auch dem Ausmaß der Erfahrung mit dem endoskopischen Verfahren an der Behandlungseinrichtung nachweisen [29,38]. Hierbei bestehen unterschiedliche Ansichten bez. der benötigten Anzahl durchgeführter operativer Eingriffe zur sicheren Beherrschung eines gynäkologisch-laparoskopischen Therapieverfahrens: Während sich in einigen Untersuchungen auch bei technisch anspruchsvollen gynäkologisch-laparoskopischen Eingriffen (Schwierigkeitsgrad IV nach Chi) bei erfahrenen Operateuren eine Lernkurve von etwa 30 Operationen als ausreichend zeigte [19], konnten andere Autoren in einer Studienkohorte mit Operateuren mit unterschiedlichem Ausbildungsstand einen Erfahrungsgewinn, in Form einer Abnahme von chirurgischen Komplikationen, auch nach 500 durchgeführten laparoskopischen Eingriffen beobachten [39]. In der eigenen Analyse erfolgte eine Orientierung an der zweitgenannten Einschätzung der endoskopischen Lernkurve, mit einer Einteilung der untersuchten Studienkollektive anhand einer Richtzahl von 500 durchgeführten Eingriffen. Bei einer derartigen Auswertung zeigten sich Hinweise auf einen Zusammenhang zwischen der Erfahrung mit einer laparoskopischen Methode an der jeweiligen Behandlungseinrichtung und dem Auftreten von chirurgischen Komplikationen: In eingeschlossenen Studienkollektiven von mehr als 500 Behandlungsverläufen wurde eine signifikant niedrigere Komplikationsrate beobachtet. Dieses Ergebnis kann mit dem Umstand in Verbindung gebracht werden, dass die 6 in dieser Analyse eingeschlossenen Publikationen, mit Studienkollektiven von weniger als 500 Patientinnen, jeweils Erfahrungen bei der Etablierung einer bis dato am durchführenden Studienzentrum neuen Operationstechnik auswerteten.

Zur Frage, ob und in welchem Umfang das Vorliegen einer malignen Grunderkrankung bei Patientinnen das Risiko für die Entwicklung von Komplikationen nach gynäkologisch-laparoskopischen Eingriffen erhöht, finden sich bislang wenige Untersuchungen: Erektion wies in einer Fallserie, die überwiegend vaginal-operative und per Laparotomie durchgeführte gynäkologisch-chirurgische Eingriffe analysierte, eine erhöhte Morbidi-

tätsrate für Patientinnen mit maligner Grunderkrankung nach [40]. Unklar ist, inwiefern sich diese Ergebnisse auf gynäkologisch-laparoskopische Eingriffe übertragen lassen. In der eigenen Analyse war das Vorliegen einer malignen Grunderkrankung kein unabhängiger Risikofaktor für das Auftreten von chirurgischen Komplikationen. Vielmehr zeigte sich in der zahlenmäßig größten eingeschlossenen Kohorte an onkologischen Behandlungsverläufen, einer Auswertung einer Arbeitsgruppe am Memorial Sloan-Kettering Cancer Center, sogar eine im Vergleich zur ermittelten Gesamtmorbidität der eigenen Untersuchung niedrigere Komplikationsrate (9% gegenüber 13%). Die niedrige Komplikationsrate der Studienkohorte dieses spezialisierten Zentrums unterstreicht die Bedeutung der nicht auf technische Aspekte beschränkten Expertise in dem gynäkologisch-laparoskopischen Therapieverfahren zur Vermeidung von chirurgischen Komplikationen [10].

Keine signifikanten Unterschiede fanden sich im Vergleich der Komplikationsraten für retrospektiv und prospektiv ausgewertete Behandlungsverläufe in der eigenen Analyse. Diese Beobachtung könnte daraufhin weisen, dass sich die Erhebung von chirurgischen Komplikationsraten in retrospektiven Kohortenstudien mithilfe des Clavien-Dindo-Systems verbessern lässt und sich der Validität der in prospektiven Studien ermittelten Komplikationsrate annähert. Neben einer terminologisch vorgegebenen Definition des Begriffs „chirurgische Komplikation“ könnte dabei auch der konzeptionelle Aufbau der Clavien-Dindo-Klassifikation von Bedeutung sein: Die Einteilung des Schweregrads einer Komplikation richtet sich nach der jeweiligen therapeutischen Intervention, die zur Korrektur der Abweichung (z. B. Antibiose, operative Revision) notwendig wurde. Da diese therapeutischen Maßnahmen regelhaft in Patientenakten dokumentiert werden, erleichtert eine derartige Einteilung eine valide retrospektive Erfassung von Komplikationen in chirurgischen Fallserien.

### Fazit für die Praxis

Durch eine Verwendung der Clavien-Dindo-Klassifikation erscheint es möglich, eine methodisch bedingte Unterschätzung der chirurgischen Morbidität bei der retrospektiven Auswertung von gynäkologisch-endoskopischen Therapieverfahren zu begrenzen. Als die chirurgische Morbidität gynäkologisch-laparoskopischer Therapieverfahren maßgeblich beeinflussende Faktoren wurden in der eigenen Analyse die jeweilige operative Erfahrung der durchführenden Behandlungseinrichtung sowie der Schwierigkeitsgrad des jeweiligen Eingriffs identifiziert.

### Danksagung

Dem Kollegium der XXIII. Akademischen Tagung Deutschsprechender Hochschullehrer in der Gynäkologie und Geburtshilfe vom September 2013 wird für die zahlreichen konstruktiven Anregungen, die in diese Arbeit eingeflossen sind, ausdrücklich gedankt.

### Interessenkonflikt

Nein.

### Literatur

- 1 Veen MR, Lardenoje JW, Kastelein GW et al. Recording and classification of complications in a surgical practice. *Eur J Surg* 1999; 165: 421–424
- 2 Sokol DK, Wilson J. What is a surgical complication? *World J Surg* 2008; 32: 942–944
- 3 Dindo D, Clavien PA. [Interest in morbidity scores and classification in general surgery]. *Cir Esp* 2009; 86: 269–271
- 4 Gruber IV, Schmidt EH, Frank V et al. [Aspects of quality assurance in gynecological endoscopy]. *Geburtsh Frauenheilk* 2007; 67: 352–358
- 5 Solomayer EF, Rody A, Wallwiener D et al. Assessment of university gynaecology clinics based on quality reports. *Geburtsh Frauenheilk* 2013; 73: 705–712
- 6 Dindo D, Demartines N, Clavien PA. Classification of surgical complications: a new proposal with evaluation in a cohort of 6336 patients and results of a survey. *Ann Surg* 2004; 240: 205–213
- 7 Dindo D, Hahnloser D, Clavien PA. Quality assessment in surgery: riding a lame horse. *Ann Surg* 2010; 251: 766–771
- 8 Mitropoulos D, Artibani W, Graefen M et al. [Reporting and grading of complications after urologic surgical procedures: an ad hoc EAU guidelines panel assessment and recommendations]. *Actas Urol Esp* 2013; 37: 1–11
- 9 Clavien PA, Sanabria JR, Strasberg SM. Proposed classification of complications of surgery with examples of utility in cholecystectomy. *Surgery* 1992; 111: 518–526
- 10 Chi DS, Abu-Rustum NR, Barakat RR. Ten-year experience with laparoscopy on a gynecologic oncology service: analysis of risk factors for complications and conversion to laparotomy. *Am J Obstet Gynecol* 2004; 191: 1138–1145
- 11 Siedhoff MT, Carey ET, Findley AD et al. Effect of extreme obesity on outcomes in laparoscopic hysterectomy. *J Minim Invasive Gynecol* 2012; 19: 701–707
- 12 Alperin M, Kivnick S, Poon KY. Outpatient laparoscopic hysterectomy for large uteri. *J Minim Invasive Gynecol* 2012; 19: 689–694
- 13 Fagotti A, Boruta DM 2nd, Scambia G et al. First 100 early endometrial cancer cases treated with laparoendoscopic single-site surgery: a multicentric retrospective study. *Am J Obstet Gynecol* 2012; 206: 353.e1–353.e6
- 14 Souadka A, Gouy S, Debaere T et al. Laparoscopic para-aortic lymphadenectomy in advanced cervical cancer: morbidity and impact on therapy. *Gynecol Obstet Fertil* 2012; 40: 153–157
- 15 Palomba S, Ghezzi F, Falbo A et al. Laparoscopic versus abdominal approach to endometrial cancer: a 10-year retrospective multicenter analysis. *Int J Gynecol Cancer* 2012; 22: 425–433
- 16 Kondo W, Bourdel N, Marengo F et al. Is laparoscopic hysterectomy feasible for uteri larger than 1000 g? *Eur J Obstet Gynecol Reprod Biol* 2011; 158: 76–81
- 17 Kondo W, Bourdel N, Tamburro S et al. Complications after surgery for deeply infiltrating pelvic endometriosis. *BJOG* 2011; 118: 292–298
- 18 Gendy R, Walsh CA, Walsh SR et al. Vaginal hysterectomy versus total laparoscopic hysterectomy for benign disease: a metaanalysis of randomized controlled trials. *Am J Obstet Gynecol* 2011; 204: 388.e1–388.e8
- 19 Hong JH, Choi JS, Lee JH et al. Comparison of survival and adverse events between women with stage IB1 and stage IB2 cervical cancer treated by laparoscopic radical vaginal hysterectomy. *Ann Surg Oncol* 2012; 19: 605–611
- 20 Radosa MP, Winzer H, Mothes AR et al. Laparoscopic myomectomy in peri- and post-menopausal women is safe, efficacious and associated with long-term patient satisfaction. *Eur J Obstet Gynecol Reprod Biol* 2012; 162: 192–196
- 21 Radosa MP, Diebolder H, Camara O et al. Laparoscopic lymphocele fenestration in gynaecological cancer patients after retroperitoneal lymph node dissection as a first-line treatment option. *BJOG* 2013; 120: 628–636
- 22 Radosa JC, Radosa MP, Mavrova R et al. Five minutes of extended assisted ventilation with an open umbilical trocar valve significantly reduces postoperative abdominal and shoulder pain in patients undergoing laparoscopic hysterectomy. *Eur J Obstet Gynecol Reprod Biol* 2013; 171: 122–127
- 23 Pini G, Porpiglia F, Micali S et al. Minilaparoscopy, needlescopy and microlaparoscopy: decreasing invasiveness, maintaining the standard laparoscopic approach. *Arch Esp Urol* 2012; 65: 366–383

- 24 Brucker S, Rothmund R, Krämer B et al. Cervical detachment using monopolar SupraLoop™ electrode versus monopolar needle in laparoscopic supracervical hysterectomy (LSH): an interventional, comparative cohort study. *Geburtsh Frauenheilk* 2013; 73: 1121–1127
- 25 Juhasz-Böss I, Mallmann P, Möller CP et al. Use of laparoscopy in the treatment of endometrial and cervical cancer – results of a 2012 Germany-wide survey. *Geburtsh Frauenheilk* 2013; 73: 911–917
- 26 Chapron C, Querleu D, Bruhat MA et al. Surgical complications of diagnostic and operative gynaecological laparoscopy: a series of 29,966 cases. *Hum Reprod* 1998; 13: 867–872
- 27 Härkki-Sirén P, Kurki T. A nationwide analysis of laparoscopic complications. *Obstet Gynecol* 1997; 89: 108–112
- 28 Mirhashemi R, Harlow BL, Ginsburg ES et al. Predicting risk of complications with gynecologic laparoscopic surgery. *Obstet Gynecol* 1998; 92: 327–331
- 29 Saidi MH, Vancaillie TG, White AJ et al. Complications of major operative laparoscopy. A review of 452 cases. *J Reprod Med* 1996; 41: 471–476
- 30 Leonard F, Lecuru F, Rizk E et al. Perioperative morbidity of gynecological laparoscopy. A prospective monocenter observational study. *Acta Obstet Gynecol Scand* 2000; 79: 129–134
- 31 Mac Cordick C, Lécuru F, Rizk E et al. Morbidity in laparoscopic gynecological surgery: results of a prospective single-center study. *Surg Endosc* 1999; 13: 57–61
- 32 Chapron C, Pierre F, Querleu D et al. Complications of laparoscopy in gynecology. *Gynecol Obstet Fertil* 2001; 29: 605–612
- 33 De Wilde RL. The danger of time-consuming operative laparoscopies: avoiding severe complications. *Geburtsh Frauenheilk* 2012; 72: 291–292
- 34 Mahdavi A, Peiretti M, Dennis S et al. Comparison of laparoscopic hysterectomy morbidity for gynecologic, oncologic, and benign gynecologic conditions. *JSLs* 2006; 10: 439–442
- 35 Canis M, Farina M, Jardon K et al. Laparoscopy and gynecologic cancer in 2005. *J Gynecol Obstet Biol Reprod* 2006; 35: 117–135
- 36 Aaronson DS, Erickson BA, Allareddy V et al. Complications rates of non-oncologic urologic procedures in population-based data: a comparison to published series. *Int Braz J Urol* 2010; 36: 548–556
- 37 Querleu D, Chapron C. Complications of gynecologic laparoscopic surgery. *Curr Opin Obstet Gynecol* 1995; 7: 257–261
- 38 Akin Y, Ates M, Celik O et al. Complications of urologic laparoscopic surgery: a center surgeon's experience involving 601 procedures including the learning curve. *Kaohsiung J Med Sci* 2013; 29: 275–279
- 39 Wattiez A, Soriano D, Cohen SB et al. The learning curve of total laparoscopic hysterectomy: comparative analysis of 1647 cases. *J Am Assoc Gynecol Laparosc* 2002; 9: 339–345
- 40 Erekson EA, Yip SO, Ciarleglio MM et al. Postoperative complications after gynecologic surgery. *Obstet Gynecol* 2011; 118: 785–793
